# Supplementary material for: Rationally Engineered Synthetic Coculture for Improved Biomass and Product Formation
Source: PubMed Central journal article supplement (PMC4254613; doi:10.1371/journal.pone.0113786), 2014-12-03
Supplement: pone.0113786.s001.pdf [file pone.0113786.s001.pdf]

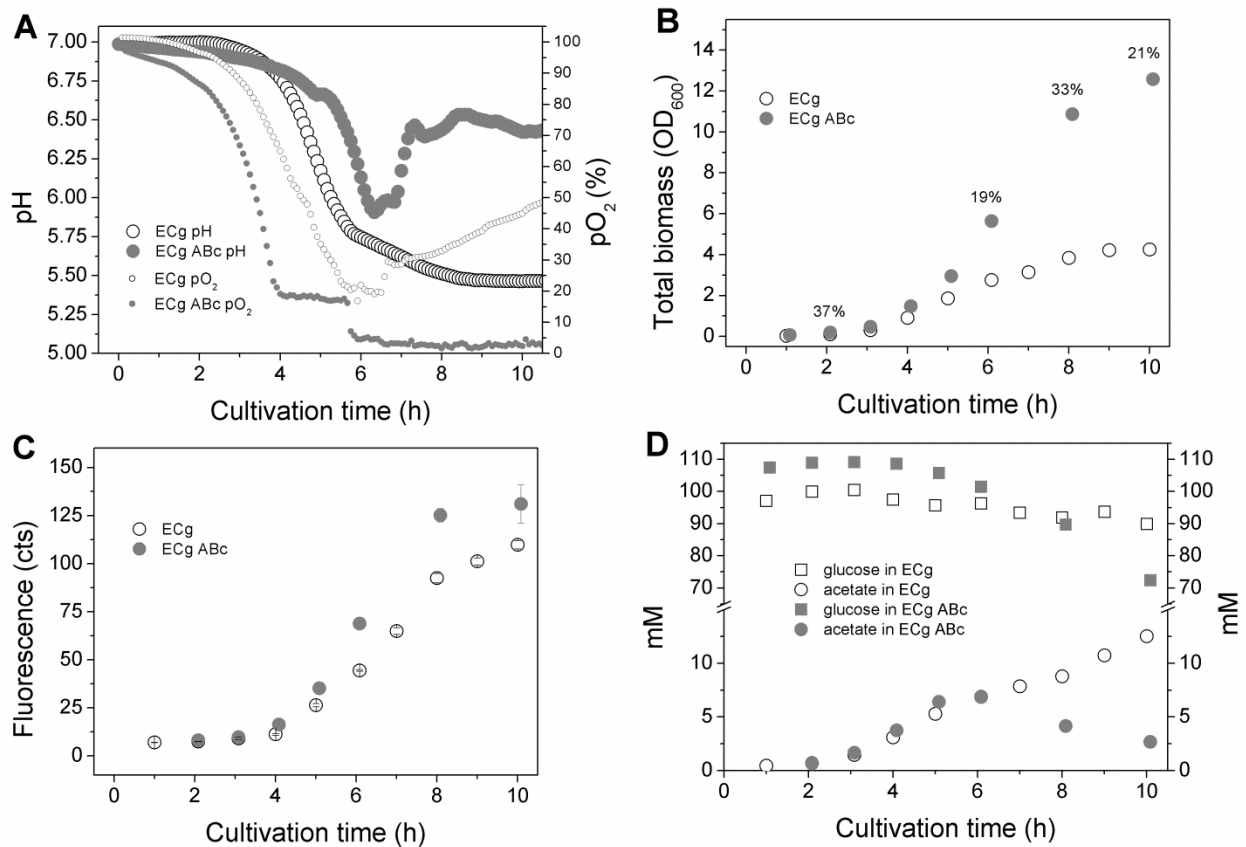

**Figure S1. Bioreactor data of ECg and ABc coculture.** A coculture of *E. coli* expressing GFP (strain ECg) and the non-fluorescent control strain *Acinetobacter baylyi*ADP1ΔgntT::Kan<sup>r</sup>/tdk. (strain ABc) was carried out in a bioreactor in a rich medium supplied with 100 mM glucose and aeration. ECg is the only strain contributing to the fluorescence production. The monoculture of ECg is presented for a reference. A) Culture parameters; pH (large circles) and oxygen partial pressure (pO<sub>2</sub> %, small circles) for ECg monoculture (empty circles) and ECgABc coculture (filled circles) B) Total biomasses (OD<sub>600</sub>) of the cultures and the proportion of ABc cells (% , CFU) in the coculture. C) Fluorescence signals (cts) for the monoculture ECg and the coculture ECgABc demonstrate the production of recombinant protein in the cultures. The mean and standard deviation of 2-4 independent culture samples are shown. ECg - *E. coli* expressing pBAV1C-T5-GFP, ABc - *A. baylyi* ADP1ΔgntT::Kan<sup>r</sup>/tdk expressing pBAV1C-ara without insert.
